# Supplementary material for: Green and catalyst-free preparation of triazinyl polyimide for the efficient adsorption of glycoproteins
Source: Royal Society of Chemistry journal article supplement (doi:10.1039/c6ra05411k), 2016-01-01
Supplement: c6ra05411k1.pdf [file c6ra05411k1.pdf]

# Electronic Supplementary Information

## **Green and catalyst-free preparation of triazinyl polyimide for efficient adsorption of glycoproteins**

Yue Zhang, Meng-Si Zhang, Yang Zhang, Xu-Wei Chen\* and Jian-Hua Wang\*

*Research Center for Analytical Sciences, College of Sciences, Northeastern University, Box  
332, Shenyang 110819, China*

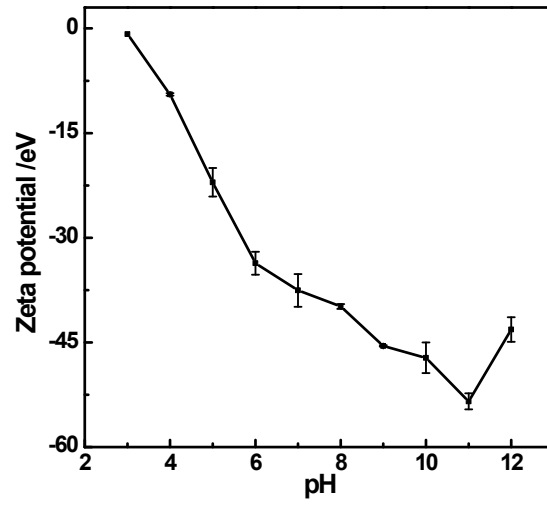

Fig. S1. Zeta potential of MA-PI within pH 3-12.

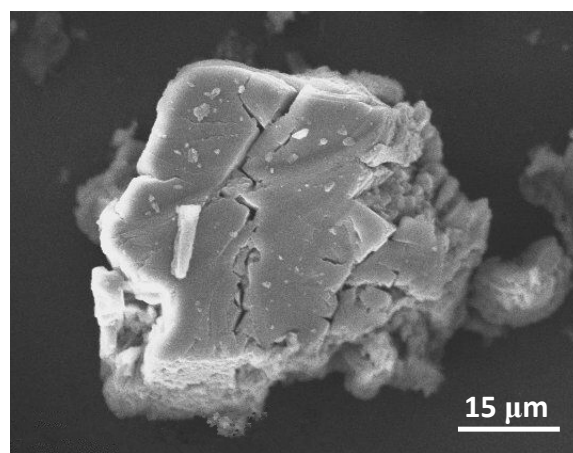

Fig. S2. SEM image of MA-PI.

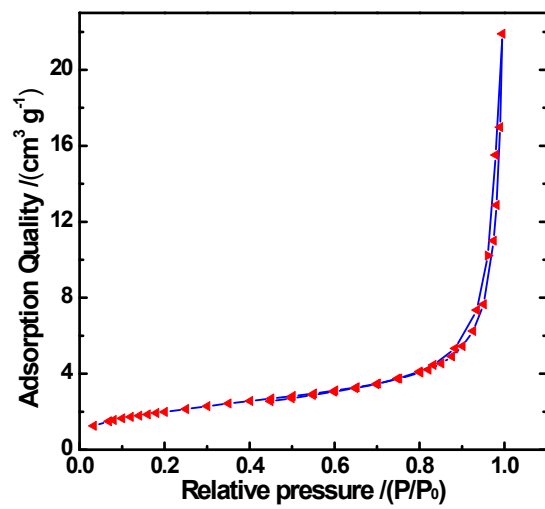

Fig. S3. N<sub>2</sub> adsorption/desorption isotherms of MA-PI.

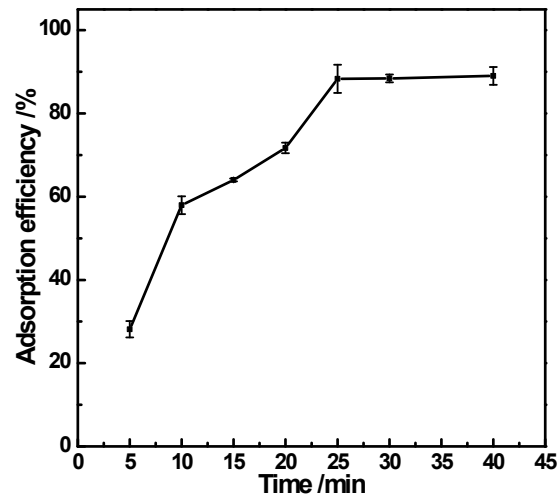

Fig. S4. The time-dependent adsorption behavior of Ova onto the surface of MA-PI. Concentration/volume of protein solution: 70 mg L<sup>-1</sup>/1.0 mL; Amount of adsorbent: 1.0 mg.

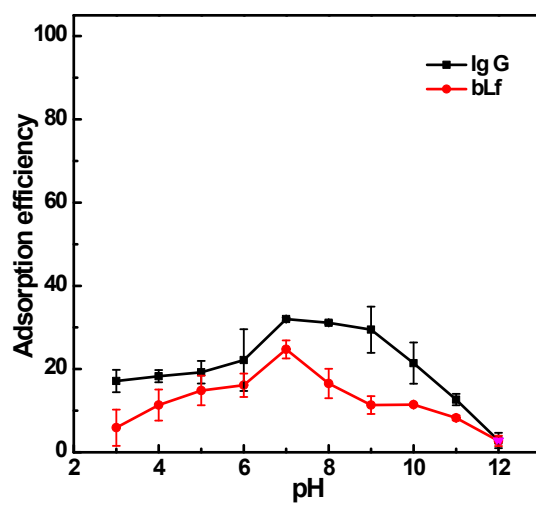

Fig. S5. The pH-dependent adsorption behaviors of IgG and bLf onto the surface of MA-PI. Concentration/volume of protein solution: 70 mg L<sup>-1</sup>/1.0 mL; Amount of adsorbent: 1.0 mg; Adsorption time: 30 min.

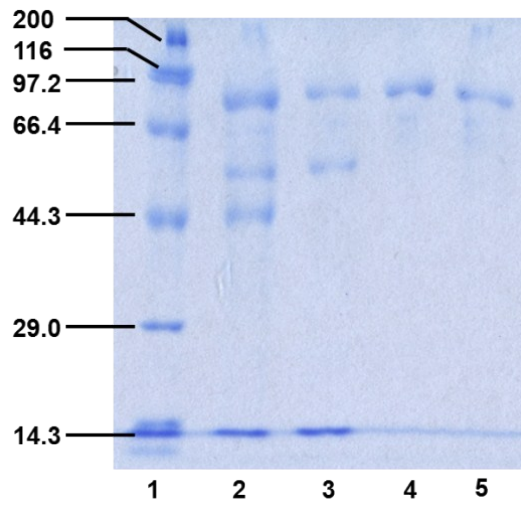

Fig. S6. SDS-PAGE assay results. Lane 1: Marker (KDa); Lane 2: Protein mixture before adsorption by the MA-PI; Lane 3: Protein mixture after adsorption by the MA-PI; Lane 4: bLf standard solution of  $100 \mu\text{g mL}^{-1}$ ; Lane 5: ConA standard solution of  $100 \mu\text{g mL}^{-1}$ . The protein mixture consists of  $200 \mu\text{g mL}^{-1}$  of Ova,  $100 \mu\text{g mL}^{-1}$  of Ig G, ConA, bLf and Lys.
